# Supplementary material for: Kinetic Constraints in the Specific Interaction between Phosphorylated Ubiquitin and Proteasomal Shuttle Factors
Source: MDPI journal article supplement (doi:10.3390/biom11071008), 2021-07-10
Supplement: s1 [file s1]

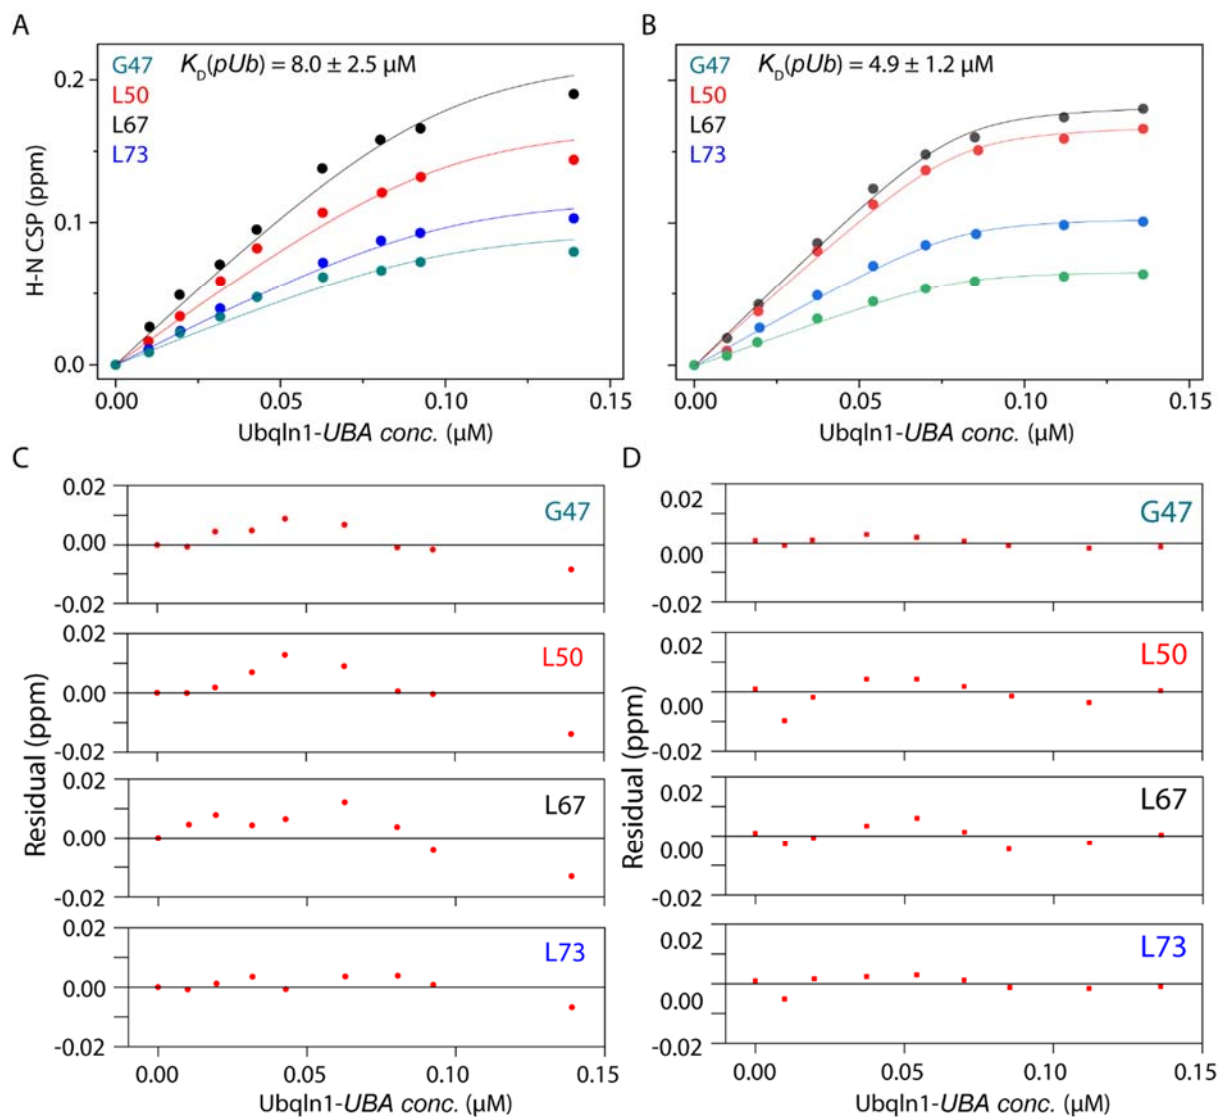

**Figure S1.** Reanalysis of the NMR titration data between *pUb* and the *UBA* domain of ubiquitin1, published by Fushman and coworkers (*Sci. Rept.* 2018; 8: 2651). The data points were digitized from Figure 3F and 3D of the paper, respectively. The data points were fitted with a simple one-site binding model, and the resulting  $K_D$  values are identical, as previously reported. The residuals of the  $K_D$  fitting are shown in Panels A and B.

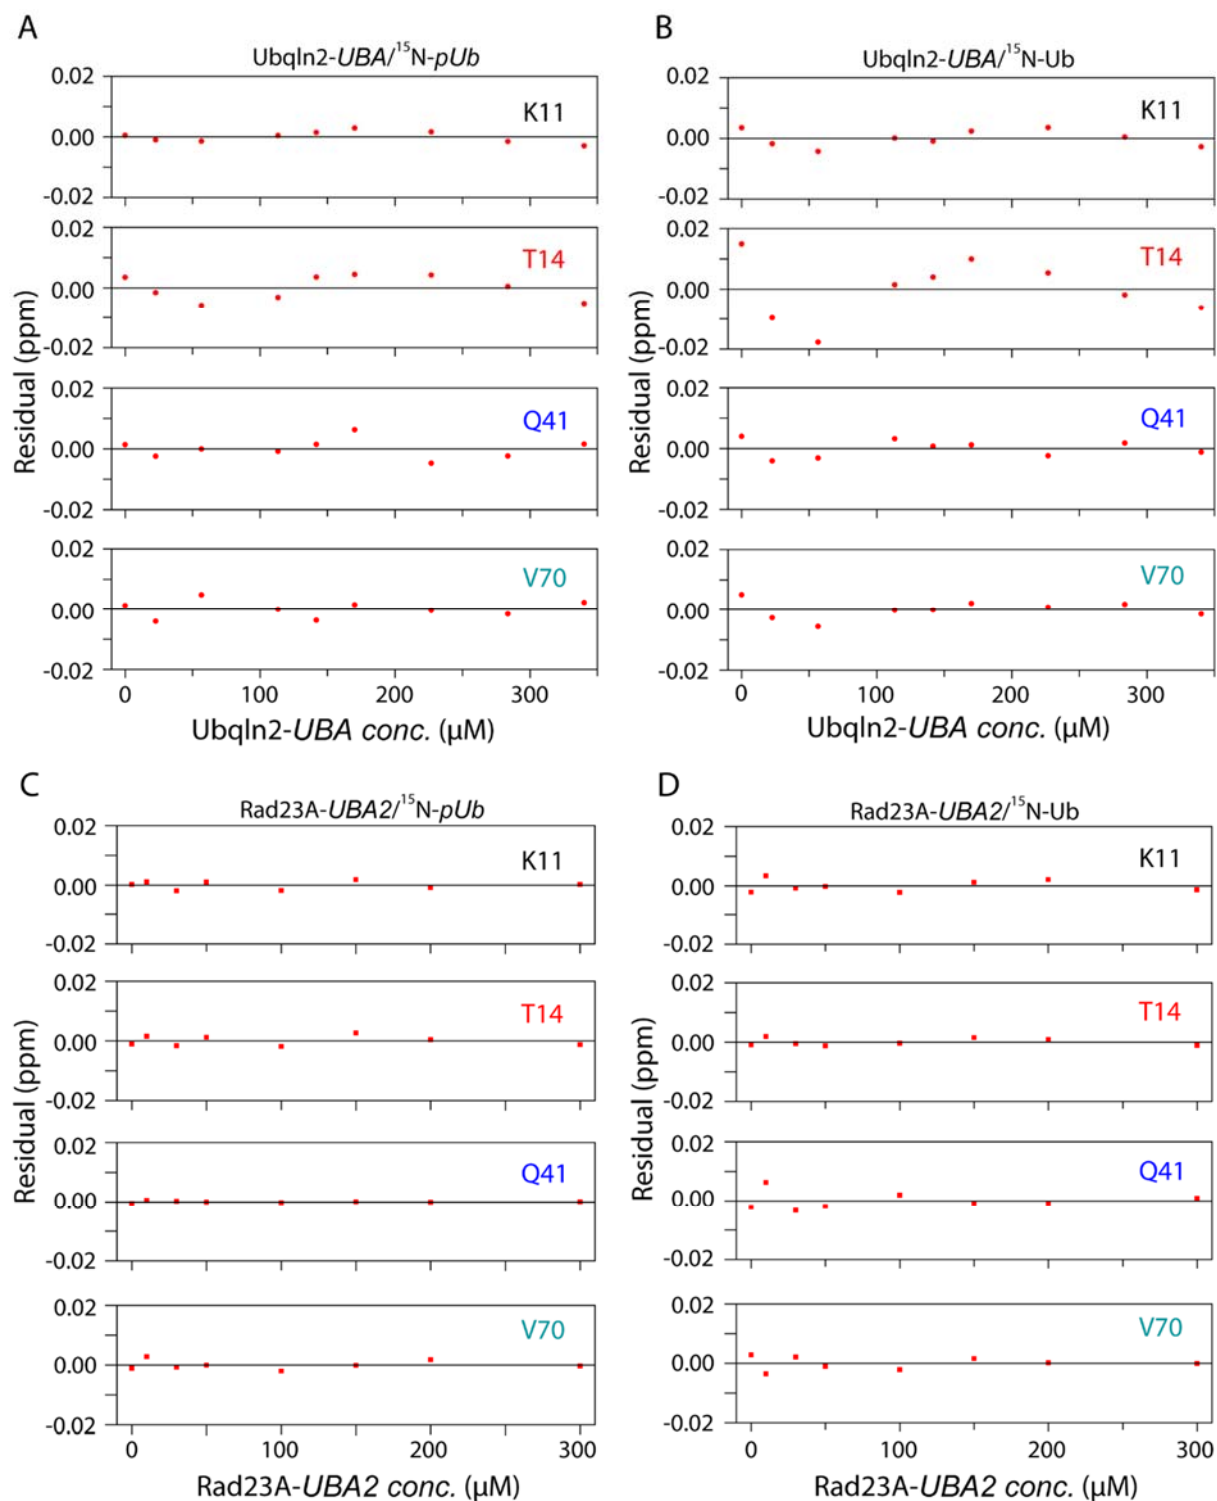

**Figure S2.** (A, C) The residuals from the fitting the CSPs of  $^{15}\text{N}$ -labeled *pUb* upon *UBA* titration, using the revised model, related to Figure 3A, C. (B, D) The residuals from the fitting the CSPs of  $^{15}\text{N}$ -labeled Ub upon *UBA* titration, using the simple one-site binding model, related to Figure 3B, D.

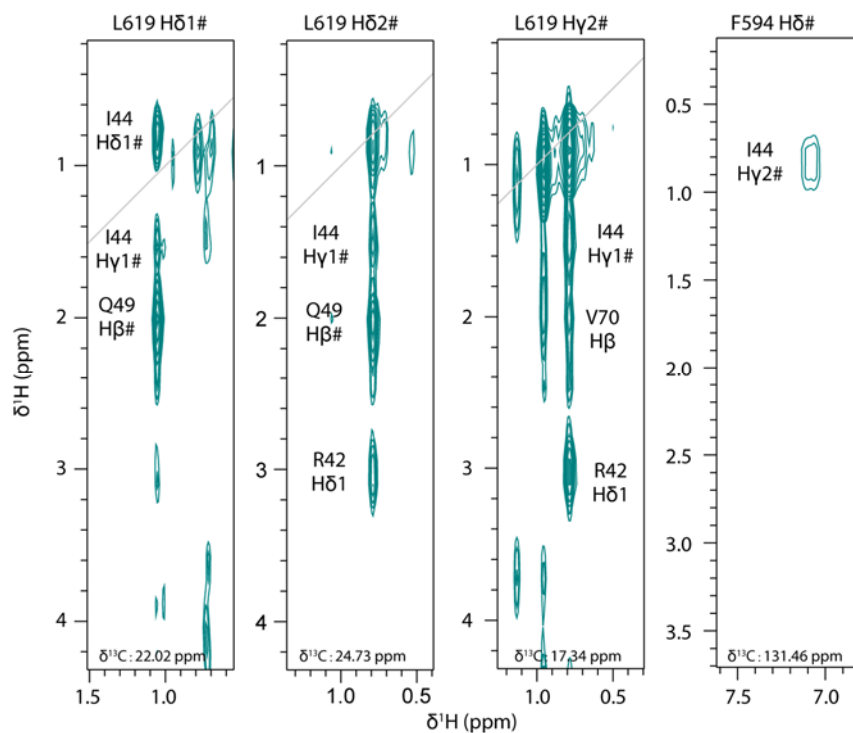

**Figure S3** Intermolecular NOEs identified between  $^{13}\text{C}$ ,  $^{15}\text{N}$ -labeled Ubqln2-UBA and unlabeled *pUb<sub>RL</sub>*. The assignments are labeled here in the F1 ( $^1\text{H}$ ) and F2 ( $^1\text{H}$ ) dimensions for the intermolecular NOEs in the F3 ( $^{13}\text{C}$ )-filtered NOESY.

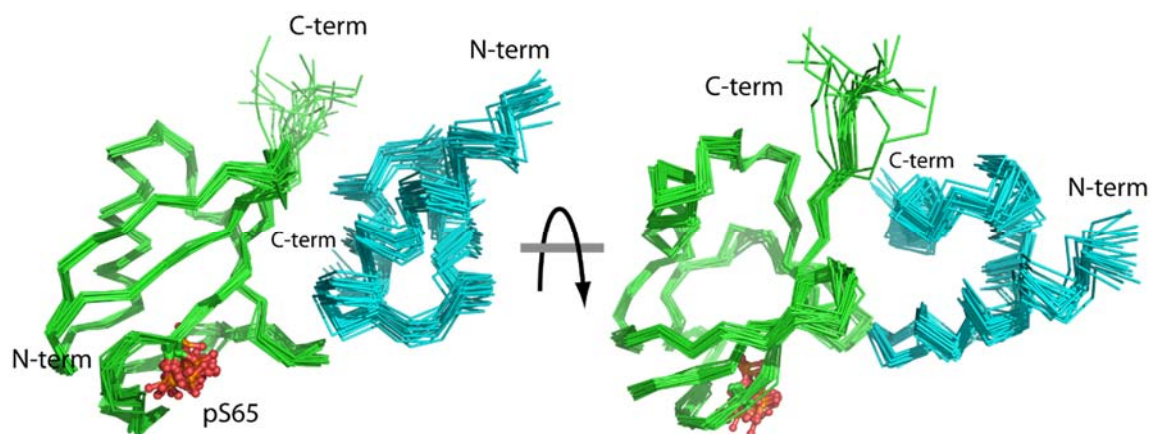

**Figure S4** Superposition of the 20 lowest-energy conformers calculated for Ubqln2-UBA (cyan) and *pUb<sub>RL</sub>* complex (green), shown in two perspectives. The structures are superimposed by backbone heavy atoms of *pUb<sub>RL</sub>*. The RMS deviation is  $0.61 \pm 0.10$  Å for the backbone heavy atoms. The phosphorylated residue pS65 is shown as sticks.

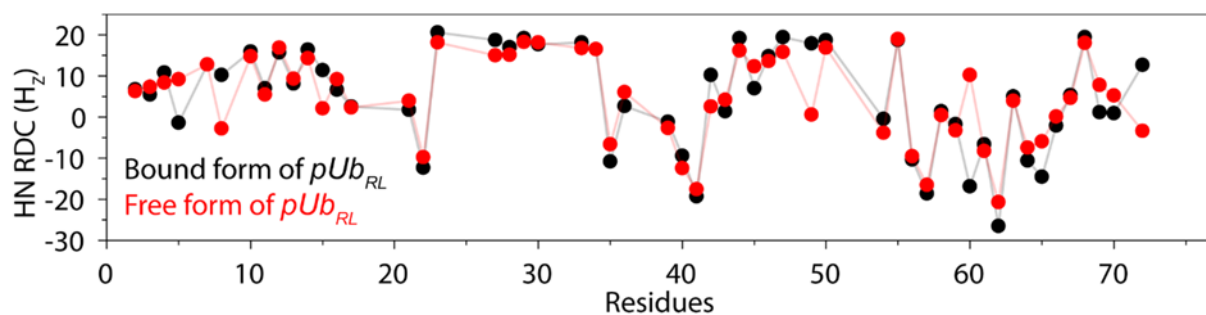

**Figure S5.** Comparison between observed and calculated RDC values for  $pUb_{RL}$ . The RDC values were measured for backbone amide bond vectors of  $pUb_{RL}$  in the free form and the complex with Ubqln2-UBA in the PEG-hexanol alignment medium extrapolated to 100% of the complex. The free  $pUb_{RL}$  structure (PDB code 5XK5) was used to calculate the theoretical RDCs using singular value decomposition.

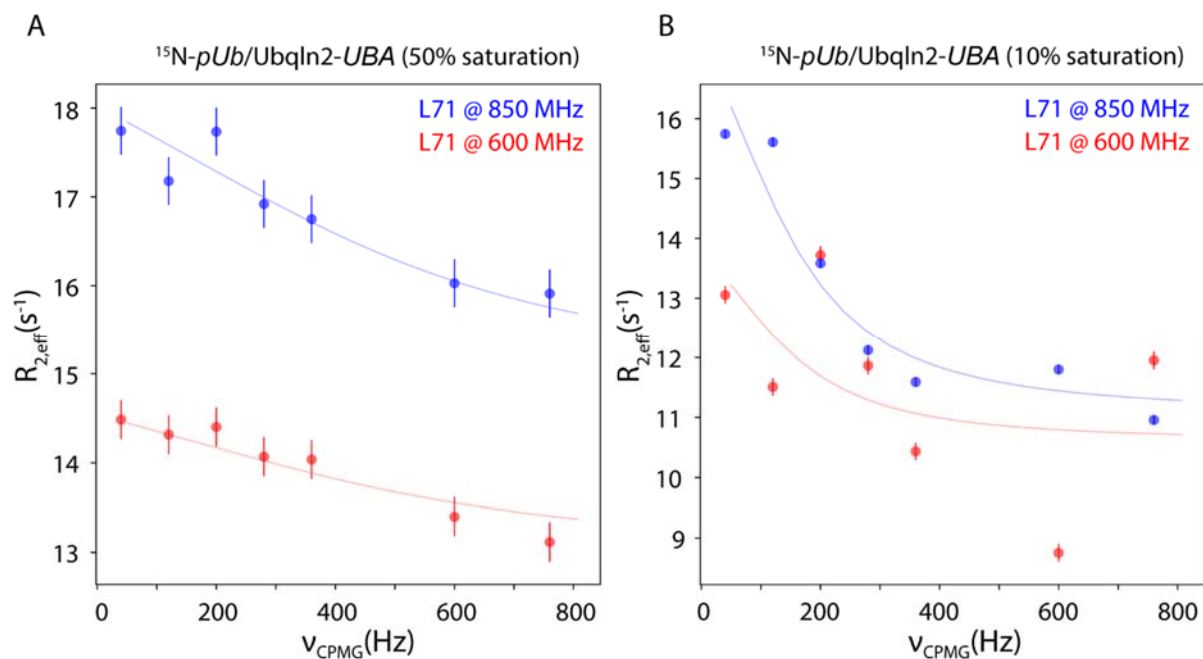

**Figure S6.** CPMG relaxation dispersion measurements were performed for  $^{15}\text{N}$ -labeled  $p\text{Ub}$  at two different magnetic fields. The unlabeled Ubqln2-UBA was added to  $\sim 10\%$  and  $\sim 50\%$  saturation. Experimental values of  $R_{2,\text{eff}}$  at different CPMG frequencies are shown as dots, with the error bar indicates one standard deviation in the measurement.

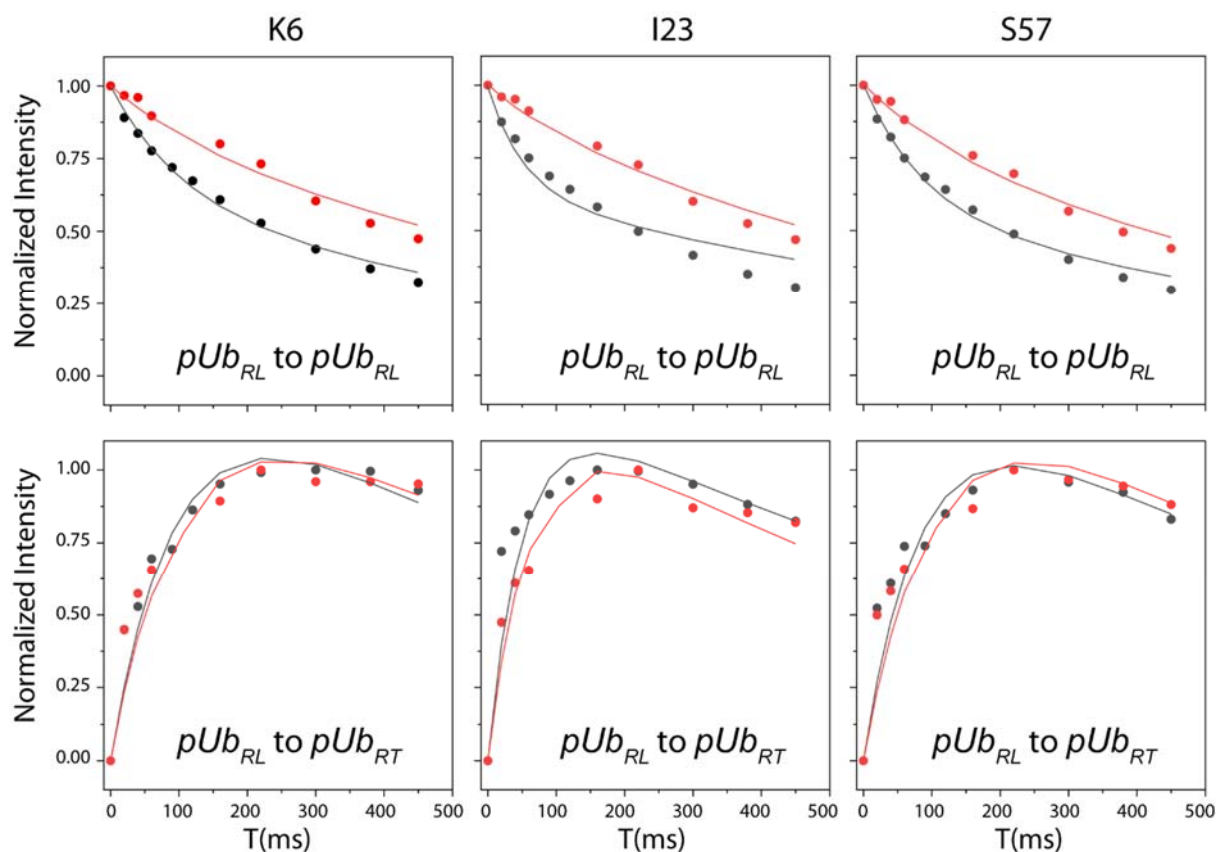

**Figure S7** The interconversion rate between  $pUb_{RL}$  and  $pUb_{RT}$  analyzed with NMR ZZ-exchange experiment. The measurements were performed for either free  $pUb$  or  $pUb$  associated with Ubqln2-UBA (380  $\mu$ M and 280  $\mu$ M, respectively, at 30  $^{\circ}$ C). Ubqln2-UBA binding causes small perturbation to the interconversion rate; the interconversion rate from  $pUb_{RL}$  to  $pUb_{RT}$  is 16.96  $s^{-1}$  in free  $pUb$  and 14.92  $s^{-1}$  in the  $pUb$  complex.

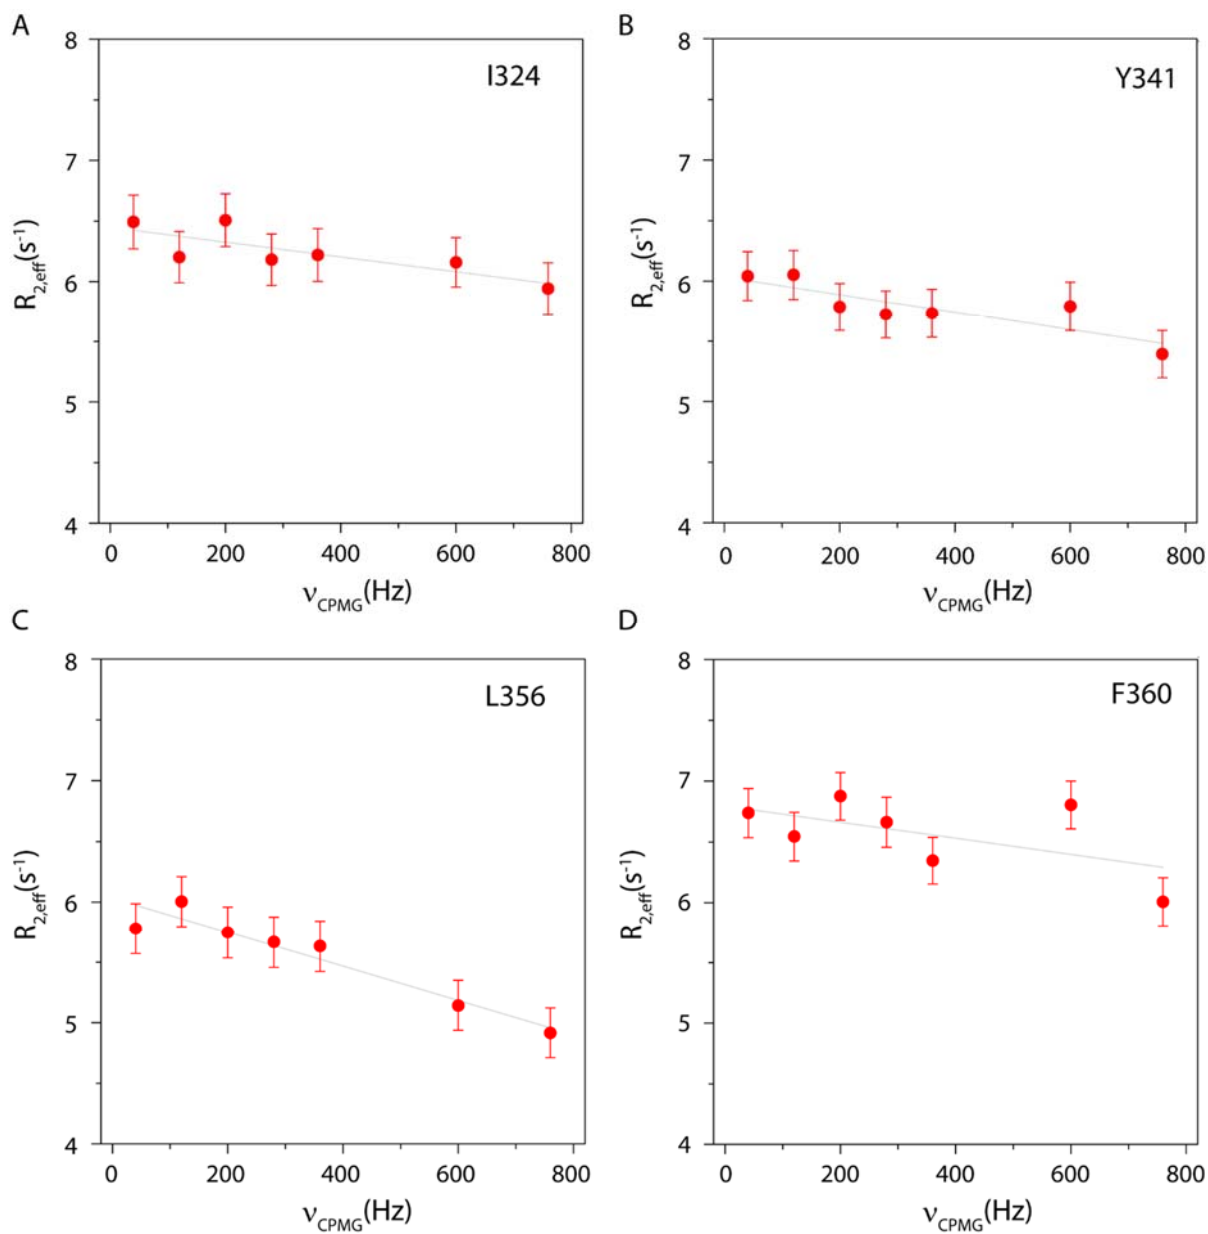

**Figure S8** CPMG relaxation dispersion measurements performed for  $^{15}\text{N}$ -labeled Rad23A-UBA2 at 600 MHz with the unlabeled *pUb* added to  $\sim 5\%$  saturation. Experimental values of  $R_{2,\text{eff}}$  at different CPMG frequencies are shown as dots, with the error bar indicates one standard deviation in the measurement.

**Table S1** Intermolecular distance restraints for the structure calculation of Ubqln2-UBA/pUb<sub>RL</sub> complex.

| Residue 1 | Atom 1 | Residue 2 | Atom 2 | Distance/Å |
|-----------|--------|-----------|--------|------------|
| 593       | HA1    | 44        | HG2#   | 4.3        |
| 593       | HA2    | 44        | HG2#   | 4.1        |
| 594       | HD#    | 44        | HG2#   | 3.9        |
| 594       | HE#    | 70        | HG2#   | 3.6        |
| 612       | HB1    | 70        | HG2#   | 3.3        |
| 612       | HB1    | 72        | HA     | 4.2        |
| 612       | HB1    | 72        | HG2    | 3.8        |
| 612       | HB2    | 72        | HA     | 4.2        |
| 612       | HB2    | 72        | HG2    | 3.8        |
| 612       | HB2    | 8         | HD2#   | 3.3        |
| 615       | HG2#   | 44        | HG12   | 3          |
| 615       | HG2#   | 68        | HB#    | 3.5        |
| 615       | HG2#   | 70        | HB     | 3.2        |
| 615       | HG2#   | 70        | HG1#   | 3          |
| 619       | HD1#   | 42        | HA     | 4.2        |
| 619       | HD1#   | 44        | HD1#   | 2.9        |
| 619       | HD1#   | 44        | HG1#   | 3.4        |
| 619       | HD1#   | 49        | HB#    | 2.7        |
| 619       | HD2#   | 42        | HD1    | 3.2        |
| 619       | HD2#   | 44        | HG1#   | 3.3        |
| 619       | HD2#   | 49        | HG2    | 2.9        |

**Table S2** Structure statistics for the Ubqln2-UBA/*pUb<sub>RL</sub>* complex.

|                                                                   |                   |
|-------------------------------------------------------------------|-------------------|
| <b>Number of restraints</b>                                       |                   |
| NOE                                                               | 1867              |
| Intra-molecular ( <i>pUb</i> relaxed state)                       | 330               |
| Intra-molecular (Ubqln2-UBA)                                      | 1521              |
| Inter-molecular                                                   | 16                |
| RDC                                                               |                   |
| PEG HN ( <i>pUb</i> relaxed state)                                | 55                |
| PEG HN (Ubqln2-UBA)                                               | 35                |
| PEG HNCO ( <i>pUb</i> relaxed state)                              | 34                |
| H-bond                                                            | 52                |
| Dihedral angles                                                   |                   |
| $\phi/\psi$                                                       | 100               |
| <b>Structure statistics</b>                                       |                   |
| Number of violations (per structure)                              |                   |
| Distance constraints ( $> 0.5 \text{ \AA}$ )                      | 0                 |
| Dihedral angle constraints ( $> 5^\circ$ )                        | 0                 |
| RDC correlation                                                   |                   |
| HN ( <i>pUb</i> relaxed state)                                    | 0.999 $\pm$ 0.000 |
| HN (Ubqln2-UBA)                                                   | 0.996 $\pm$ 0.001 |
| HNCO ( <i>pUb</i> relaxed state)                                  | 0.953 $\pm$ 0.010 |
| <b>Average Pairwise r.m.s deviation (<math>\text{\AA}</math>)</b> |                   |
| Back-bone atoms                                                   | 0.81 $\pm$ 0.09   |
| All atoms                                                         | 1.20 $\pm$ 0.07   |
| <b>Ramachandran plot (aa:1-72)</b>                                |                   |
| most favored                                                      | 85.5%             |
| additionally allowed                                              | 11.8%             |
| generously allowed                                                | 0.8%              |
| disallowed                                                        | 0.9%              |
| <b>Z-scores (aa:1-72)</b>                                         |                   |
| 2nd generation packing quality                                    | -1.102            |
| Ramachandran plot appearance                                      | -2.929            |
| $\chi^1/\chi^2$ rotamer normality                                 | -2.315            |
| Backbone conformation                                             | -0.646            |

**Table S3** The fitted values of  $k_{\text{ex}}$ ,  $k_{\text{on}}$ , and  $k_{\text{off}}$  of  $pUb_{RL}/Ubqln2-UBA$  complex. These data were calculated by fitting corresponding CPMG data of  $^{15}\text{N}-Ubqln2-UBA/pUb$  and  $^{15}\text{N}-pUb/Ubqln2-UBA$  samples when  $\sim 10\%$  and  $\sim 50\%$  saturated.

| Sample                              | Complex % | $k_{\text{ex}} (\text{s}^{-1})$ | $k_{\text{on}} (\mu\text{M}^{-1} \cdot \text{s}^{-1})$ | $k_{\text{off}} (\text{s}^{-1})$ |
|-------------------------------------|-----------|---------------------------------|--------------------------------------------------------|----------------------------------|
| $^{15}\text{N}$ -labeled <i>UBA</i> | 10%       | 320.3 $\pm$ 13.9                | 6.8 $\pm$ 0.6                                          | 293.1 $\pm$ 27.5                 |
|                                     | 50%       | 1382.9 $\pm$ 3.7                | 15.6 $\pm$ 1.4                                         | 677.8 $\pm$ 61.0                 |
| $^{15}\text{N}$ -labeled <i>pUb</i> | 10%       | 506.2 $\pm$ 4.0                 | 9.8 $\pm$ 0.9                                          | 426.1 $\pm$ 38.5                 |
|                                     | 50%       | 1694.2 $\pm$ 9.4                | 14.3 $\pm$ 1.3                                         | 618.2 $\pm$ 55.6                 |

The parameter and topology files for the phosphorylated Ser (SEP) are shown as follows:

##### Topology #####

residue SEP

group

atom N type=NH1 charge=-0.36 end

atom HN type=H charge= 0.26 end

group

atom CA type=CT charge= 0.00 end

atom HA type=HA charge= 0.10 end

group

atom CB type=CT charge= 0.08 end

atom HB1 type=HA charge= 0.10 end

atom HB2 type=HA charge= 0.10 end

group

atom OG type=OH charge=-0.68 end

group

atom P type=XP charge= 1.88 end

atom O1P type=XO2 charge=-0.40 end

atom O2P type=XO2 charge=-0.40 end

atom O3P type=XO2 charge=-0.40 end

group

atom C type=C charge= 0.48 end

atom O type=O charge=-0.48 end

bond N HN

bond N CA bond CA HA

bond CA CB bond CB HB1 bond CB HB2

bond CB OG bond OG P

bond P O1P bond P O2P bond P O3P

bond O C

bond C CA

improper HA N C CB

improper HB1 HB2 CA OG

dihedral OG CB CA N

dihedral P OG CB CA

##### Parameter #####

bond XP OH \$kbon 1.537

bond XP XO2 \$kbon 1.567

angle OH XP XO2 \$kang 106.7

angle CT OH XP \$kang 120

angle XO2 XP XO2 \$kang 115

dihedral XP OH CT CT \$kdih 3 0.0

NONBonded XP 0.5849 3.3854 0.5849 3.3854

NONBonded XO2 0.2304 2.7290 0.2304 2.7290
